# Supplementary material
Source: PubMed Central journal article supplement (PMC3791591)
Supplement: NIHMS517666-supplement-Supplementary_Text_and_Figures.pdf [file NIHMS517666-supplement-Supplementary_Text_and_Figures.pdf]

Supplementary Figure 1. Schematic of processes detected by SourceTracker.

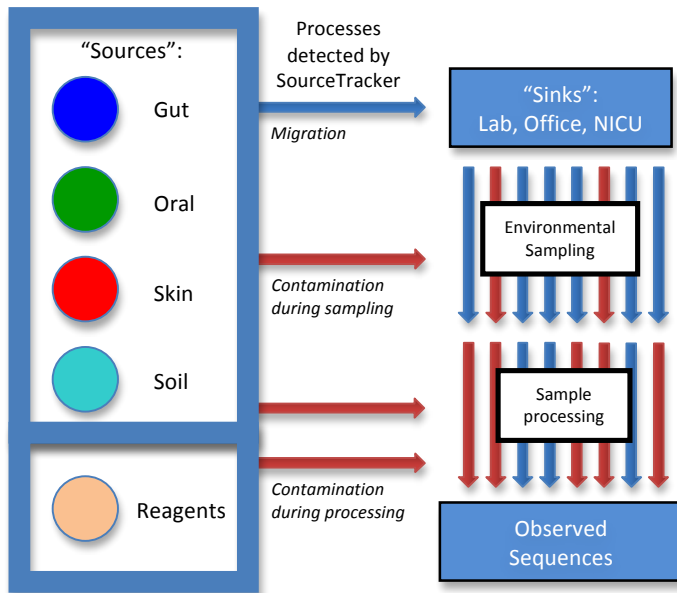

SourceTracker allows tracking of source environments that have contributed organisms to sink samples. Transfer of microbes may occur in nature prior to sampling (migration), or during the sampling and processing steps (contamination). To demonstrate the utility of SourceTracker, we addressed the question of which sources may commonly contribute to the microbial communities on the surfaces of indoor environments including laboratories, offices, and NICUs. Several of the sink environments characterized (PCR water, laboratory benches) are themselves potential sources of contamination, and they contribute to the library of potential sources that we envision tracking with SourceTracker in future environmental samples.

Supplementary Figure 2. Principal coordinates analysis of unweighted UniFrac distances.

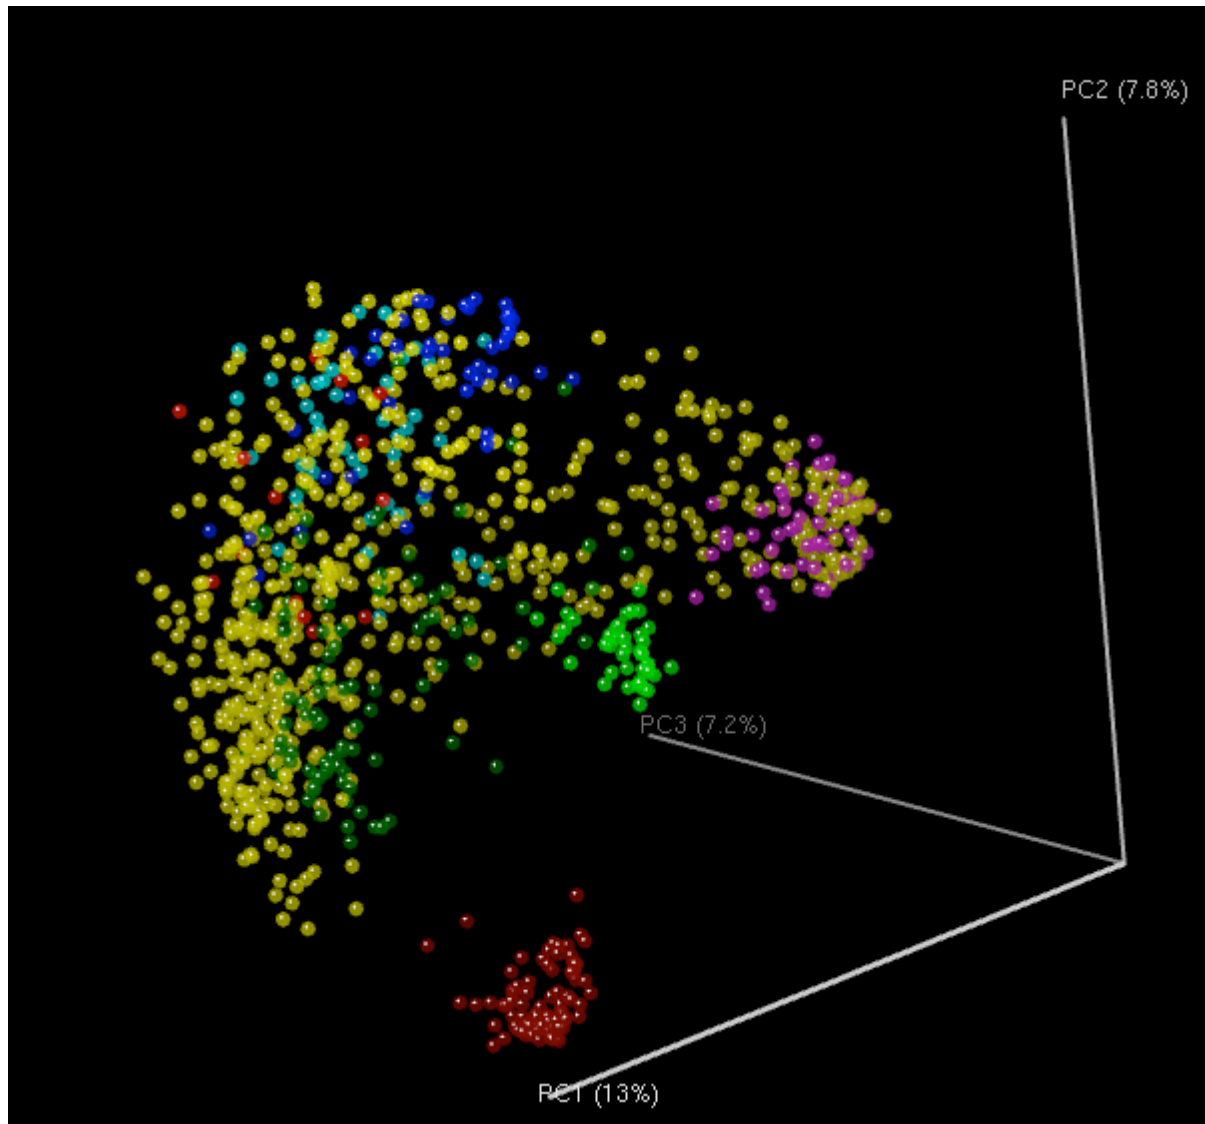

Contamination samples: dark green; Soil samples: dark red (bottom of figure); Whole body samples as follows: External ear canal: dark blue; Gut: light green (center of figure); Hair: red (center left); Nostril: light blue; Oral: purple; Skin: yellow. The first 3 principal coordinates are shown, rotated to display most clearly the variation among groups in 2 dimensions.

Supplementary Figure 3. Heatmap of the 454 OTUs present in at least 20 samples.

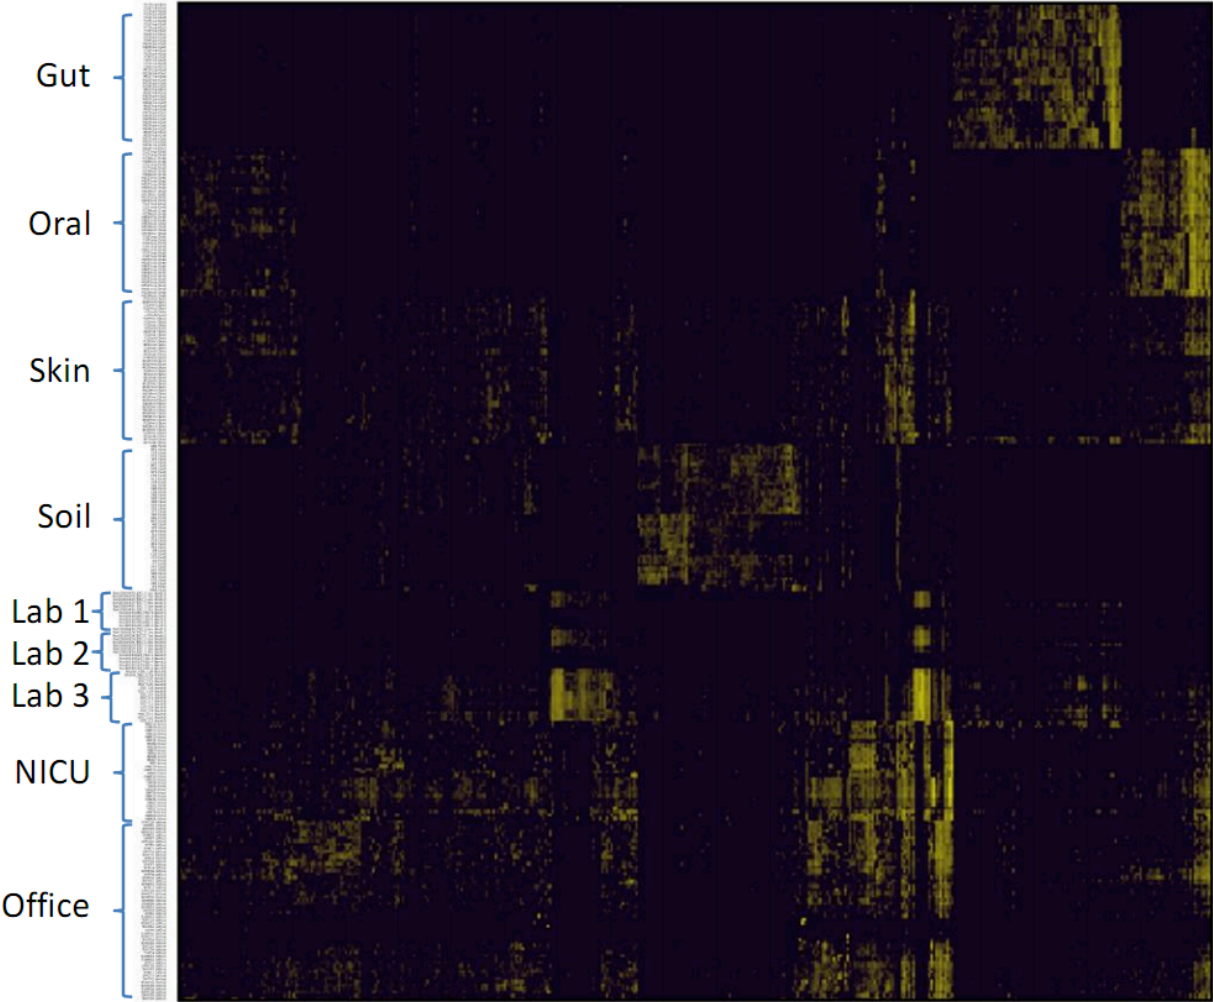

Heatmap values represent log relative abundance. Hierarchical clustering (Unweighted Pair Group Method with Arithmetic Mean) was performed on the columns (OTUs), and again on the rows within each environment.

Supplementary Figure 4. Estimated composition of all source samples using SourceTracker.

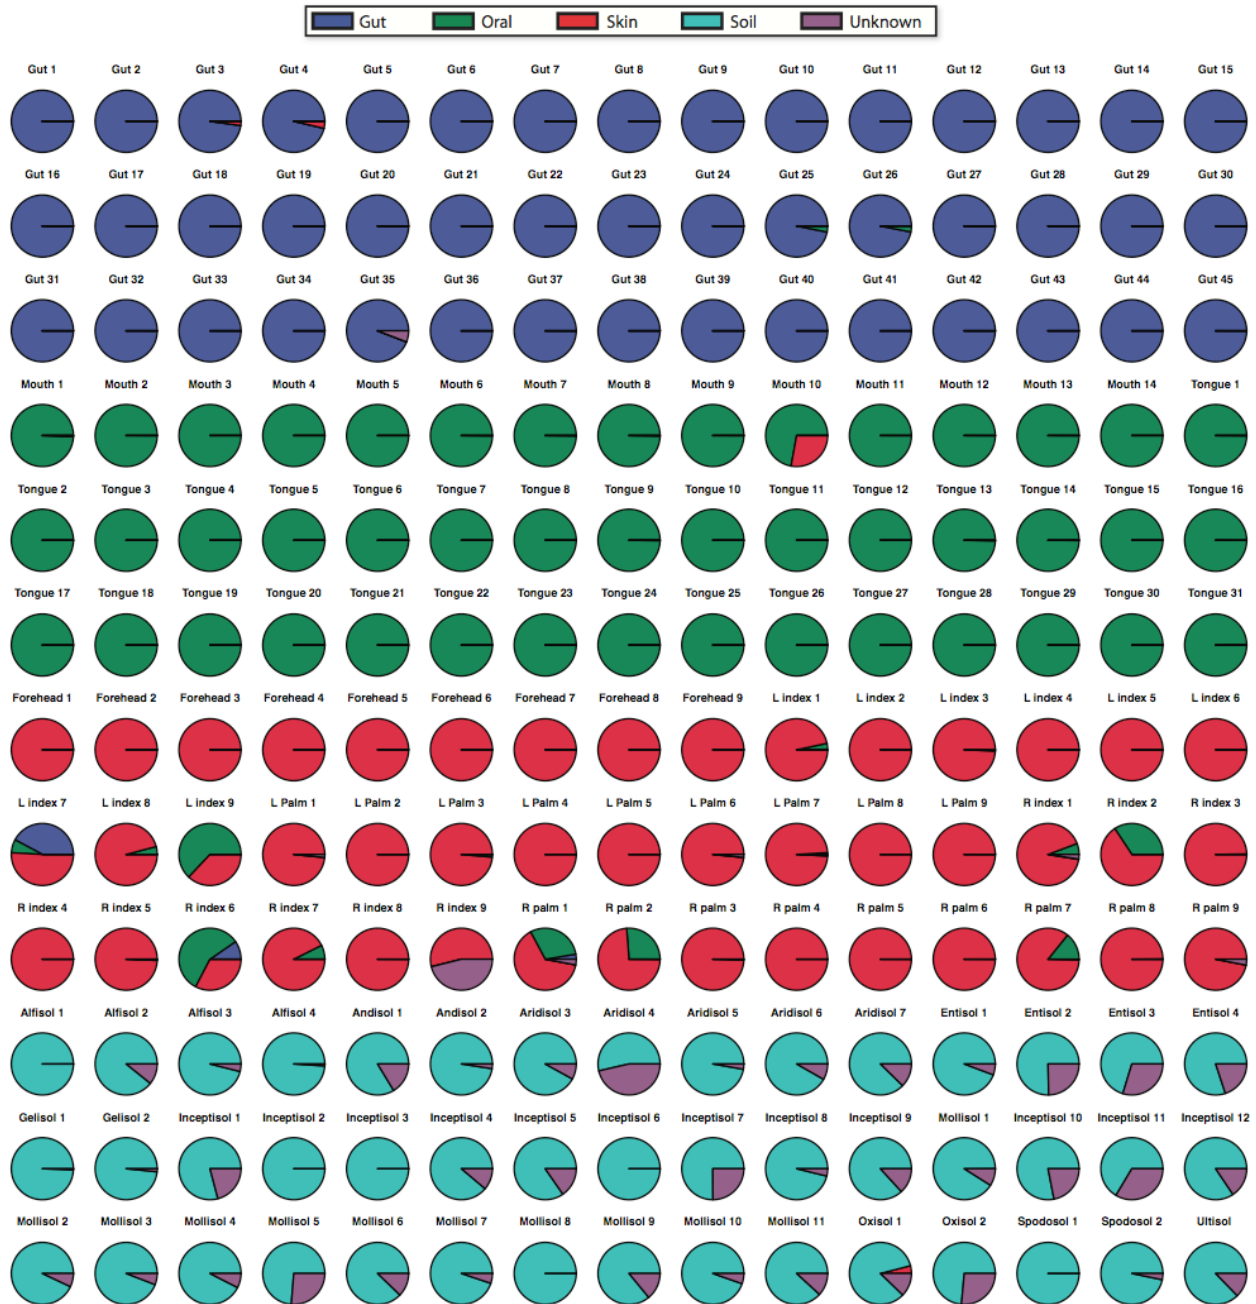

Source proportion estimates were predicted using a leave-one-out approach. For a given sample, that sample was removed from the training process (estimation of the distributions over taxa in each source environment), and then treated as a single sink sample for estimation. The first three rows are Gut, the next three Oral, the next three Skin, and the last three Soil. The higher prevalence of Unknown bacteria in the Soil samples is an indication that the soil training set has less of a “core” microbiome than the other source training sets.

Supplementary Figure 5. Estimated composition of all sink samples using SourceTracker.

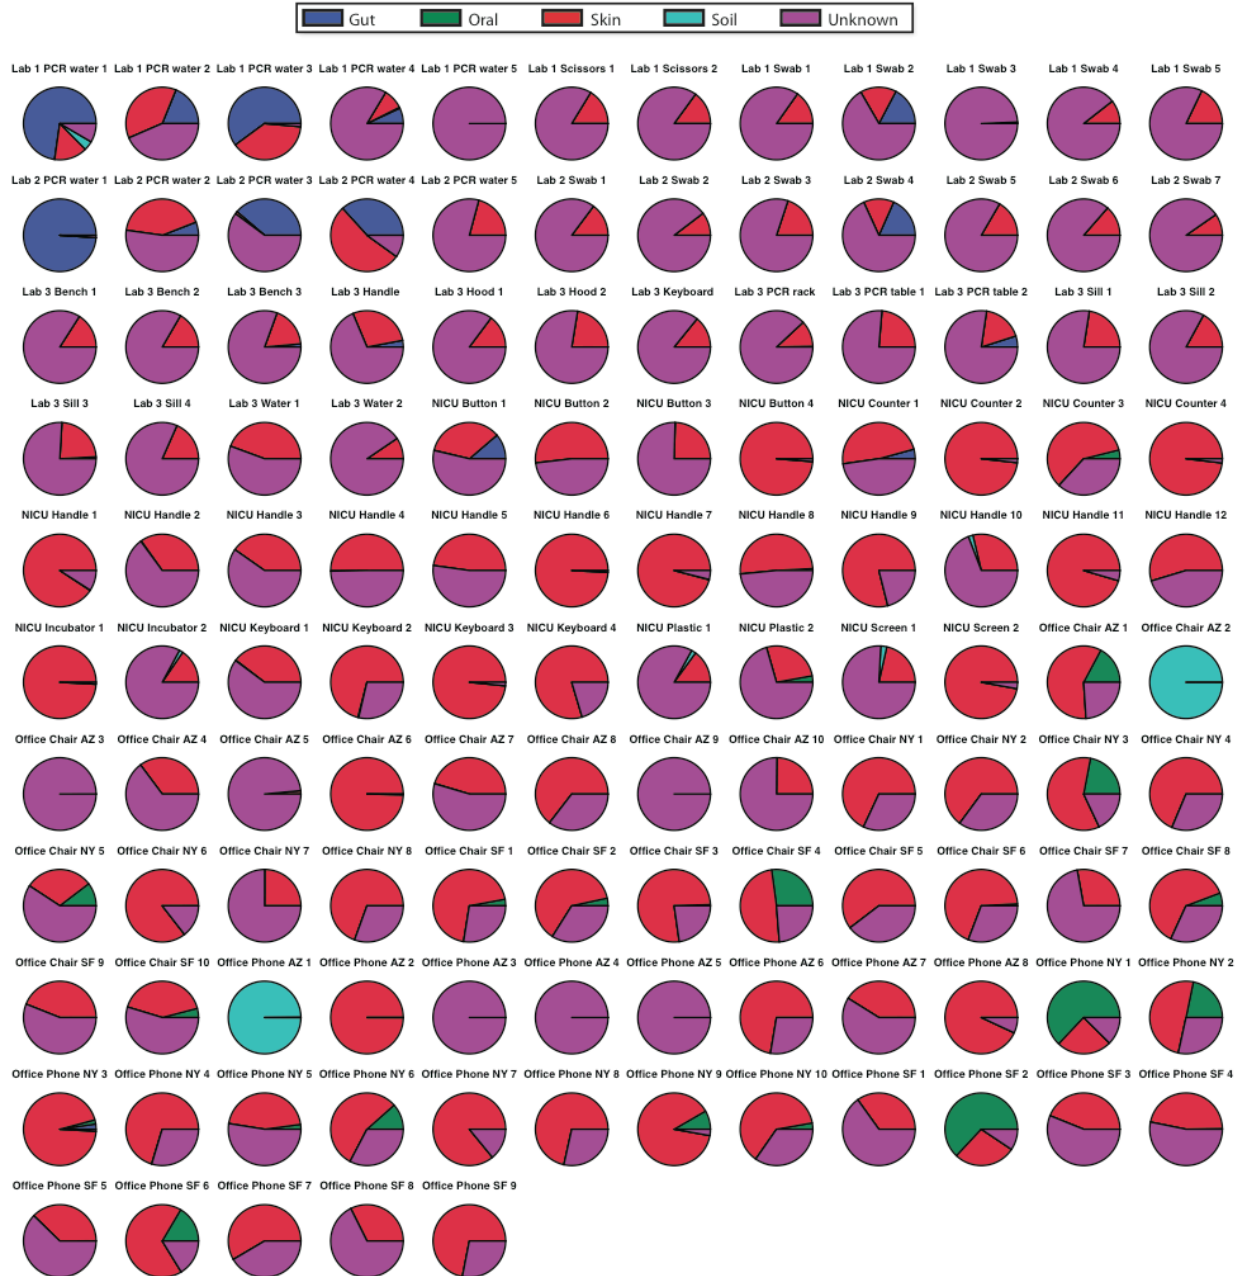

Source environment proportions were estimated using SourceTracker and 45 training samples from each source environment (**Supplementary Table 2**). The pie charts show the mean proportions for 100 draws from Gibbs sampling.

Supplementary Figure 6. ROC curves for detecting simulated contamination using SourceTracker.

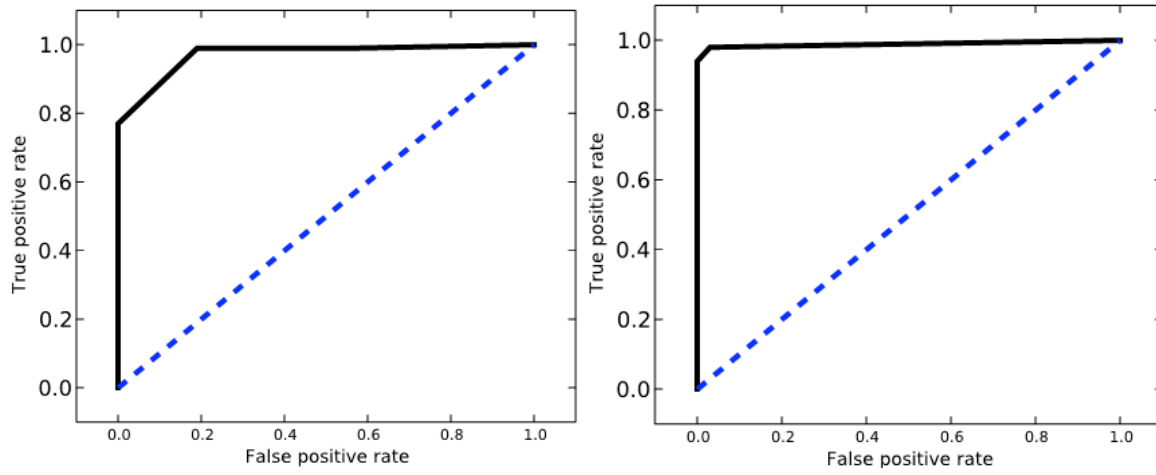

(a) 1% contamination, area under curve (AOC) is 0.971; (b) 5% contamination, AOC is 0.989.

Supplementary Figure 7. Simulation algorithm for partially overlapping source environments.

1. For concentration parameters  $a \in 10^{\{3.5, 3., 2.5, 2., 1.5, 1., 0.5, 0., -0.5\}}$ :
  - a. Draw multinomials  $P, Q \sim \text{Dirichlet}(a)$ .
    - i. Remove any taxa with zero density in both  $P$  and  $Q$ , replace with taxon densities from a new draw from  $\text{Dirichlet}(a)$ . Repeat until all 100 taxa have some density in  $P, Q$  or both.
  - b. Draw 100 training data samples with 1,000 sequences each from each source distribution  $p_{\text{SOURCE}} \sim P, q_{\text{SOURCE}} \sim Q$ .
  - c. For  $i = 1..100$ :
    - i. Generate random mixing proportion  $m \sim \text{Uniform}(0,1)$ .
    - ii. Draw 1 community sample each,  $p_{\text{SINK}} \sim P, q_{\text{SINK}} \sim Q$ , with  $m \times 1,000, (1-m) \times 1,000$  sequences, respectively.
    - iii. Set the sink sample abundances to  $p_{\text{SINK}} + q_{\text{SINK}}$
    - iv. Estimate the source proportions in this sink sample using SourceTracker, naïve Bayes, and the randomForest R package<sup>1</sup>, with the synthetic training data from step (1b) above.
  - d. Collect the coefficients of determination ( $R^2$ ) of the predictions of all three models for the 100 synthetic sink samples
  - e. Calculate the Jensen-Shannon divergence of  $P, Q$
2. Include an additional value of  $R^2 = 0$  for each proportion estimation method at Jensen-Shannon divergence = 0, where disambiguation is impossible, and empirical  $R^2$  values are sometimes negative.

Supplementary Table 1. DNA barcodes, primers, and descriptions for “Sink” data samples.

| Sample ID             | Barcode Sequence | Linker Primer Sequence | Environment | Description |
|-----------------------|------------------|------------------------|-------------|-------------|
| Run20100430_ESC_C-1ss | CGAACGTT         | CTGCTGCCTYCCGTA        | Lab 1       | Swab 4      |
| Run20100430_ESC_C-2ss | CGAAGCTT         | CTGCTGCCTYCCGTA        | Lab 1       | Swab 5      |
| Run20100430_ESC_C-3ss | CGCGAATT         | CTGCTGCCTYCCGTA        | Lab 1       | Swab 3      |
| Run20100430_ESC_C-4ss | CGCGTAAT         | CTGCTGCCTYCCGTA        | Lab 1       | Swab 1      |
| Run20100430_ESC_C-5ss | CGGCAATT         | CTGCTGCCTYCCGTA        | Lab 1       | Swab 2      |
| Run20100430_ESC_C-6as | CGGCATAT         | CTGCTGCCTYCCGTA        | Lab 1       | Scissors 2  |
| Run20100430_ESC_C-7as | CGGCTAAT         | CTGCTGCCTYCCGTA        | Lab 1       | Scissors 1  |
| Run20100430_H2O-1     | CGGCTATA         | CTGCTGCCTYCCGTA        | Lab 1       | PCR water 1 |
| Run20100430_H2O-2     | ATGGTACC         | CTGCTGCCTYCCGTA        | Lab 1       | PCR water 2 |
| Run20100430_H2O-3     | AATTCCGG         | CTGCTGCCTYCCGTA        | Lab 1       | PCR water 3 |
| Run20100430_H2O-4     | TCGTCAAG         | CTGCTGCCTYCCGTA        | Lab 1       | PCR water 4 |
| Run20100430_H2O-5     | CCGGATAT         | CTGCTGCCTYCCGTA        | Lab 1       | PCR water 5 |
| Run20100524_ESC_C-1ss | CGAACGTT         | CTGCTGCCTYCCGTA        | Lab 2       | Swab 7      |
| Run20100524_ESC_C-2ss | CGAAGCTT         | CTGCTGCCTYCCGTA        | Lab 2       | Swab 1      |
| Run20100524_ESC_C-3ss | CGCGAATT         | CTGCTGCCTYCCGTA        | Lab 2       | Swab 2      |
| Run20100524_ESC_C-4ss | CGCGTAAT         | CTGCTGCCTYCCGTA        | Lab 2       | Swab 3      |
| Run20100524_ESC_C-5ss | CGGCAATT         | CTGCTGCCTYCCGTA        | Lab 2       | Swab 4      |
| Run20100524_ESC_C-6as | CGGCATAT         | CTGCTGCCTYCCGTA        | Lab 2       | Swab 6      |
| Run20100524_ESC_C-7as | CGGCTAAT         | CTGCTGCCTYCCGTA        | Lab 2       | Swab 5      |
| Run20100524_H2O-1     | CGGCTATA         | CTGCTGCCTYCCGTA        | Lab 2       | PCR water 1 |
| Run20100524_H2O-2     | ATGGTACC         | CTGCTGCCTYCCGTA        | Lab 2       | PCR water 2 |
| Run20100524_H2O-3     | AATTCCGG         | CTGCTGCCTYCCGTA        | Lab 2       | PCR water 3 |
| Run20100524_H2O-4     | TCGTCAAG         | CTGCTGCCTYCCGTA        | Lab 2       | PCR water 4 |
| Run20100524_H2O-5     | CCGGATAT         | CTGCTGCCTYCCGTA        | Lab 2       | PCR water 5 |
| Bission_H2O_1_JH      | CTACGATG         | CTGCTGCCTYCCGTA        | Lab 3       | Water 1     |
| Bission_H2O_2_CA      | ATCCGGTA         | CTGCTGCCTYCCGTA        | Lab 3       | Water 2     |
| ESC_3.0               | TATACCGG         | CTGCTGCCTYCCGTA        | Lab 3       | Hood 1      |
| ESC_3.1               | TACCTAGG         | CTGCTGCCTYCCGTA        | Lab 3       | Sill 2      |
| ESC_3.10              | GTACCTAG         | CTGCTGCCTYCCGTA        | Lab 3       | Bench 1     |
| ESC_3.11              | GTACCATG         | CTGCTGCCTYCCGTA        | Lab 3       | Sill 1      |
| ESC_3.12              | GCTTAACG         | CTGCTGCCTYCCGTA        | Lab 3       | Handle      |
| ESC_3.13              | GCTAATCG         | CTGCTGCCTYCCGTA        | Lab 3       | Hood 2      |
| ESC_3.14              | GCATTACG         | CTGCTGCCTYCCGTA        | Lab 3       | PCR table 1 |
| ESC_3.15              | GCAATTCG         | CTGCTGCCTYCCGTA        | Lab 3       | Sill 3      |
| ESC_3.2               | TACCATGG         | CTGCTGCCTYCCGTA        | Lab 3       | Bench 2     |
| ESC_3.3               | TAATGCCG         | CTGCTGCCTYCCGTA        | Lab 3       | Sill 4      |
| ESC_3.6               | TAATCGCG         | CTGCTGCCTYCCGTA        | Lab 3       | PCR rack    |
| ESC_3.7               | TAATCCGG         | CTGCTGCCTYCCGTA        | Lab 3       | Keyboard    |



|         |               |                       |        |             |
|---------|---------------|-----------------------|--------|-------------|
| ESC_3.8 | GTTCCAAG      | CTGCTGCCTYCCGTA       | Lab 3  | Bench 3     |
| ESC_3.9 | GTCAACTG      | CTGCTGCCTYCCGTA       | Lab 3  | PCR table 2 |
| MBD10   | CGTTATGTACAC  | CATGCTGCCTCCCGTAGGAGT | NICU   | Counter 1   |
| MBP17   | CTACTGATATCG  | CATGCTGCCTCCCGTAGGAGT | NICU   | Plastic 1   |
| MBP4    | CGTGACAATGTC  | CATGCTGCCTCCCGTAGGAGT | NICU   | Plastic 2   |
| MBR13   | CTACACAAGCAC  | CATGCTGCCTCCCGTAGGAGT | NICU   | Handle 2    |
| MBT14   | CTACATCTAAGC  | CATGCTGCCTCCCGTAGGAGT | NICU   | Screen 1    |
| MDB6    | CGTGCATTATCA  | CATGCTGCCTCCCGTAGGAGT | NICU   | Button 3    |
| MDB7    | CGTGTACATCAG  | CATGCTGCCTCCCGTAGGAGT | NICU   | Button 2    |
| MII5    | CGTGATCTCTCC  | CATGCTGCCTCCCGTAGGAGT | NICU   | Incubator 2 |
| MIK12   | CTAACGCAGTCA  | CATGCTGCCTCCCGTAGGAGT | NICU   | Keyboard 1  |
| MIR11   | CGTTTCGATAGA  | CATGCTGCCTCCCGTAGGAGT | NICU   | Handle 3    |
| MIW3    | CGTCGATCTCTC  | CATGCTGCCTCCCGTAGGAGT | NICU   | Handle 10   |
| MPK2    | CGTCAGACGGAT  | CATGCTGCCTCCCGTAGGAGT | NICU   | Keyboard 2  |
| MSC8    | CGTGTGATCAGG  | CATGCTGCCTCCCGTAGGAGT | NICU   | Handle 1    |
| MSO9    | CGTTACTAGAGC  | CATGCTGCCTCCCGTAGGAGT | NICU   | Counter 3   |
| MSS1    | CGTCACGACTAA  | CATGCTGCCTCCCGTAGGAGT | NICU   | Handle 12   |
| MWR15   | CTACGCGTCTCT  | CATGCTGCCTCCCGTAGGAGT | NICU   | Handle 4    |
| MWR16   | CTACTACAGGTG  | CATGCTGCCTCCCGTAGGAGT | NICU   | Handle 5    |
| UBD22   | CTAGTCAGCTGA  | CATGCTGCCTCCCGTAGGAGT | NICU   | Counter 2   |
| UBR25   | CTATCTAGCGAG  | CATGCTGCCTCCCGTAGGAGT | NICU   | Handle 6    |
| UBT30   | CTCCACATGAGA  | CATGCTGCCTCCCGTAGGAGT | NICU   | Screen 2    |
| UDB19   | CTAGAGACTCTT  | CATGCTGCCTCCCGTAGGAGT | NICU   | Button 1    |
| UDB31   | CTCCTACTGTCT  | CATGCTGCCTCCCGTAGGAGT | NICU   | Button 4    |
| UII29   | CTCATGTACAGT  | CATGCTGCCTCCCGTAGGAGT | NICU   | Incubator 1 |
| UIK27   | CTCAATGACTCA  | CATGCTGCCTCCCGTAGGAGT | NICU   | Keyboard 3  |
| UIR24   | CTATCAGTGAC   | CATGCTGCCTCCCGTAGGAGT | NICU   | Handle 7    |
| UIW23   | CTATAGTCGTGT  | CATGCTGCCTCCCGTAGGAGT | NICU   | Handle 11   |
| UPK18   | CTAGAACGCACT  | CATGCTGCCTCCCGTAGGAGT | NICU   | Keyboard 4  |
| USO26   | CTATGCTTGATG  | CATGCTGCCTCCCGTAGGAGT | NICU   | Counter 4   |
| UWR20   | CTAGCGAACATC  | CATGCTGCCTCCCGTAGGAGT | NICU   | Handle 8    |
| UWR21   | CTAGGTCACTAG  | CATGCTGCCTCCCGTAGGAGT | NICU   | Handle 9    |
| NYFC16  | TCCTAGCAGTGA  | CATGCTGCCTCCCGTAGGAGT | Office | Chair NY 1  |
| NYFC22  | TCCGTCGTCTGT  | CATGCTGCCTCCCGTAGGAGT | Office | Chair NY 2  |
| NYFC4   | TCCACGTCGTCT  | CATGCTGCCTCCCGTAGGAGT | Office | Chair NY 3  |
| NYFC7   | TCCAGTGCAGAGA | CATGCTGCCTCCCGTAGGAGT | Office | Chair NY 4  |
| NYFP16  | TCATGGTACTACT | CATGCTGCCTCCCGTAGGAGT | Office | Phone NY 4  |
| NYFP19  | TCATCGCGATAT  | CATGCTGCCTCCCGTAGGAGT | Office | Phone NY 6  |
| NYFP22  | TCATCTGACTGA  | CATGCTGCCTCCCGTAGGAGT | Office | Phone NY 3  |
| NYFP4   | TCAGTCGACGAG  | CATGCTGCCTCCCGTAGGAGT | Office | Phone NY 1  |
| NYFP7   | TCAGTGACGTAC  | CATGCTGCCTCCCGTAGGAGT | Office | Phone NY 5  |

|        |              |                       |        |             |
|--------|--------------|-----------------------|--------|-------------|
| NYMC18 | TCAGCTCAACTA | CATGCTGCCTCCCGTAGGAGT | Office | Chair NY 5  |
| NYMC23 | TCAGGACTGTGT | CATGCTGCCTCCCGTAGGAGT | Office | Chair NY 6  |
| NYMC31 | TCAGTACGAGGC | CATGCTGCCTCCCGTAGGAGT | Office | Chair NY 7  |
| NYMC5  | TCAGCCATGACA | CATGCTGCCTCCCGTAGGAGT | Office | Chair NY 8  |
| NYMP18 | TCACTATGGTCA | CATGCTGCCTCCCGTAGGAGT | Office | Phone NY 2  |
| NYMP23 | TCACTGGCAGTA | CATGCTGCCTCCCGTAGGAGT | Office | Phone NY 7  |
| NYMP28 | TCACTTCTCGCT | CATGCTGCCTCCCGTAGGAGT | Office | Phone NY 8  |
| NYMP31 | TCAGATCCGATG | CATGCTGCCTCCCGTAGGAGT | Office | Phone NY 9  |
| NYMP5  | TCACGATTAGCG | CATGCTGCCTCCCGTAGGAGT | Office | Phone NY 10 |
| SFFC10 | CGATCGAGTGTT | CATGCTGCCTCCCGTAGGAGT | Office | Chair SF 1  |
| SFFC2  | CGATAGATCTTC | CATGCTGCCTCCCGTAGGAGT | Office | Chair SF 2  |
| SFFC23 | CGATGCACCAGA | CATGCTGCCTCCCGTAGGAGT | Office | Chair SF 3  |
| SFFC24 | CGATGTCGTCAA | CATGCTGCCTCCCGTAGGAGT | Office | Chair SF 4  |
| SFFC3  | CGATATTCATCG | CATGCTGCCTCCCGTAGGAGT | Office | Chair SF 5  |
| SFFP10 | CGAGGCTCAGTA | CATGCTGCCTCCCGTAGGAGT | Office | Phone SF 5  |
| SFFP2  | CGAGAGTTACGC | CATGCTGCCTCCCGTAGGAGT | Office | Phone SF 6  |
| SFFP23 | CGAGTCTAGTTG | CATGCTGCCTCCCGTAGGAGT | Office | Phone SF 3  |
| SFFP24 | CGAGTTGTAGCG | CATGCTGCCTCCCGTAGGAGT | Office | Phone SF 4  |
| SFFP3  | CGAGCAGCACAT | CATGCTGCCTCCCGTAGGAGT | Office | Phone SF 1  |
| SFMC16 | CGACAGCTGACA | CATGCTGCCTCCCGTAGGAGT | Office | Chair SF 6  |
| SFMC28 | CGACATGTATT  | CATGCTGCCTCCCGTAGGAGT | Office | Chair SF 7  |
| SFMC29 | CGACTTATGTGT | CATGCTGCCTCCCGTAGGAGT | Office | Chair SF 8  |
| SFMC5  | CGAAGACTGCTG | CATGCTGCCTCCCGTAGGAGT | Office | Chair SF 9  |
| SFMC7  | CGAATCGACACT | CATGCTGCCTCCCGTAGGAGT | Office | Chair SF 10 |
| SFMP16 | TCCTGAGATACG | CATGCTGCCTCCCGTAGGAGT | Office | Phone SF 2  |
| SFMP28 | TCGAATCACAGC | CATGCTGCCTCCCGTAGGAGT | Office | Phone SF 7  |
| SFMP29 | TCGACTCCTCGT | CATGCTGCCTCCCGTAGGAGT | Office | Phone SF 8  |
| SFMP7  | TCCTCTGTGAC  | CATGCTGCCTCCCGTAGGAGT | Office | Phone SF 9  |
| TUFC13 | CGTAGAACGTGC | CATGCTGCCTCCCGTAGGAGT | Office | Chair AZ 1  |
| TUFC19 | CGTATCTGCGAA | CATGCTGCCTCCCGTAGGAGT | Office | Chair AZ 2  |
| TUFC22 | CGTATGCTGTAT | CATGCTGCCTCCCGTAGGAGT | Office | Chair AZ 3  |
| TUFC24 | CGTACTAGACTG | CATGCTGCCTCCCGTAGGAGT | Office | Chair AZ 4  |
| TUFC4  | CGTCAACGATGT | CATGCTGCCTCCCGTAGGAGT | Office | Chair AZ 5  |
| TUFP22 | CGTAAGTCTACT | CATGCTGCCTCCCGTAGGAGT | Office | Phone AZ 4  |
| TUFP24 | CGGCGATGTACA | CATGCTGCCTCCCGTAGGAGT | Office | Phone AZ 1  |
| TUFP4  | CGTACAGTTATC | CATGCTGCCTCCCGTAGGAGT | Office | Phone AZ 3  |
| TUMC11 | CGCGATAGCAGT | CATGCTGCCTCCCGTAGGAGT | Office | Chair AZ 6  |
| TUMC15 | CGCGTAACTGTA | CATGCTGCCTCCCGTAGGAGT | Office | Chair AZ 7  |
| TUMC18 | CGCTAGAACGCA | CATGCTGCCTCCCGTAGGAGT | Office | Chair AZ 8  |
| TUMC23 | CGCTTATCGAGA | CATGCTGCCTCCCGTAGGAGT | Office | Chair AZ 9  |
| TUMC25 | CGGAGTGTCTAT | CATGCTGCCTCCCGTAGGAGT | Office | Chair AZ 10 |

|        |              |                       |        |            |
|--------|--------------|-----------------------|--------|------------|
| TUMP11 | CGCACATGTTAT | CATGCTGCCTCCCGTAGGAGT | Office | Phone AZ 2 |
| TUMP15 | CGCACTCTAGAA | CATGCTGCCTCCCGTAGGAGT | Office | Phone AZ 5 |
| TUMP18 | CGCAGACAGACT | CATGCTGCCTCCCGTAGGAGT | Office | Phone AZ 6 |
| TUMP23 | CGCAGCGGTATA | CATGCTGCCTCCCGTAGGAGT | Office | Phone AZ 7 |
| TUMP25 | CGCATGAGGATC | CATGCTGCCTCCCGTAGGAGT | Office | Phone AZ 8 |

Supplementary Table 2. Sample identifiers and descriptions for “Source” data samples.

| Sample ID | Environment | Description   |
|-----------|-------------|---------------|
| AR1       | Soil        | Oxisol 1      |
| BB2       | Soil        | Spodosol 1    |
| BF1       | Soil        | Alfisol 1     |
| BP1       | Soil        | Entisol 1     |
| BZ1       | Soil        | Gelisol 1     |
| CA2       | Soil        | Alfisol 2     |
| CC1       | Soil        | Inceptisol 1  |
| CF3       | Soil        | Inceptisol 2  |
| CL3       | Soil        | Ultisol       |
| CM1       | Soil        | Mollisol 1    |
| CO2       | Soil        | Alfisol 3     |
| CO3       | Soil        | Mollisol 2    |
| CR1       | Soil        | Mollisol 3    |
| DF3       | Soil        | Alfisol 4     |
| GB5       | Soil        | Mollisol 4    |
| HF2       | Soil        | Inceptisol 3  |
| HI4       | Soil        | Andisol 1     |
| HJ2       | Soil        | Andisol 2     |
| IE2       | Soil        | Inceptisol 4  |
| IT2       | Soil        | Spodosol 2    |
| JT1       | Soil        | Aridisol 3    |
| KP4       | Soil        | Mollisol 5    |
| LQ2       | Soil        | Inceptisol 5  |
| MD5       | Soil        | Aridisol 4    |
| MP2       | Soil        | Inceptisol 6  |
| MT1       | Soil        | Inceptisol 7  |
| PE1       | Soil        | Inceptisol 8  |
| PE7       | Soil        | Oxisol 2      |
| RT1       | Soil        | Mollisol 6    |
| RT2       | Soil        | Mollisol 7    |
| SA1       | Soil        | Entisol 2     |
| SA2       | Soil        | Entisol 3     |
| SB1       | Soil        | Inceptisol 9  |
| SF1       | Soil        | Aridisol 5    |
| SK1       | Soil        | Mollisol 8    |
| SK3       | Soil        | Mollisol 9    |
| SN1       | Soil        | Inceptisol 10 |
| SN3       | Soil        | Inceptisol 11 |

|         |      |               |
|---------|------|---------------|
| SP1     | Soil | Inceptisol 12 |
| SP2     | Soil | Entisol 4     |
| SR2     | Soil | Mollisol 10   |
| SV1     | Soil | Aridisol 6    |
| SV2     | Soil | Aridisol 7    |
| TL3     | Soil | Gelisol 2     |
| VC2     | Soil | Mollisol 11   |
| F11Fcsp | Gut  | Gut 1         |
| F11Fcsw | Gut  | Gut 2         |
| F12Fcsp | Gut  | Gut 3         |
| F12Fcsw | Gut  | Gut 4         |
| F13Fcsw | Gut  | Gut 5         |
| F14Fcsw | Gut  | Gut 6         |
| F21Fcsp | Gut  | Gut 7         |
| F21Fcsw | Gut  | Gut 8         |
| F22Fcsp | Gut  | Gut 9         |
| F22Fcsw | Gut  | Gut 10        |
| F23Fcsw | Gut  | Gut 11        |
| F24Fcsw | Gut  | Gut 12        |
| F31Fcsp | Gut  | Gut 13        |
| F31Fcsw | Gut  | Gut 14        |
| F32Fcsp | Gut  | Gut 15        |
| F32Fcsw | Gut  | Gut 16        |
| F33Fcsw | Gut  | Gut 17        |
| F34Fcsw | Gut  | Gut 18        |
| M11Fcsp | Gut  | Gut 19        |
| M11Fcsw | Gut  | Gut 20        |
| M12Fcsp | Gut  | Gut 21        |
| M12Fcsw | Gut  | Gut 22        |
| M13Fcsw | Gut  | Gut 23        |
| M14Fcsw | Gut  | Gut 24        |
| M21Fcsp | Gut  | Gut 25        |
| M21Fcsw | Gut  | Gut 26        |
| M22Fcsp | Gut  | Gut 27        |
| M22Fcsw | Gut  | Gut 28        |
| M23Fcsw | Gut  | Gut 29        |
| M24Fcsw | Gut  | Gut 30        |
| M31Fcsp | Gut  | Gut 31        |
| M31Fcsw | Gut  | Gut 32        |
| M32Fcsp | Gut  | Gut 33        |
| M32Fcsw | Gut  | Gut 34        |

|         |      |           |
|---------|------|-----------|
| M33Fcsw | Gut  | Gut 35    |
| M41Fcsp | Gut  | Gut 36    |
| M41Fcsw | Gut  | Gut 37    |
| M42Fcsp | Gut  | Gut 38    |
| M42Fcsw | Gut  | Gut 39    |
| M43Fcsw | Gut  | Gut 40    |
| M44Fcsw | Gut  | Gut 41    |
| M53Fcsw | Gut  | Gut 42    |
| M54Fcsw | Gut  | Gut 43    |
| M63Fcsw | Gut  | Gut 44    |
| M64Fcsw | Gut  | Gut 45    |
| F11Tong | Oral | Tongue 1  |
| F12Tong | Oral | Tongue 2  |
| F13Tong | Oral | Tongue 3  |
| F14Tong | Oral | Tongue 4  |
| F21Tong | Oral | Tongue 5  |
| F22Tong | Oral | Tongue 6  |
| F23Tong | Oral | Tongue 7  |
| F24Tong | Oral | Tongue 8  |
| F31Tong | Oral | Tongue 9  |
| F32Tong | Oral | Tongue 10 |
| F33Tong | Oral | Tongue 11 |
| F34Tong | Oral | Tongue 12 |
| M11Tong | Oral | Tongue 13 |
| M12Tong | Oral | Tongue 14 |
| M13Tong | Oral | Tongue 15 |
| M14Tong | Oral | Tongue 16 |
| M21Tong | Oral | Tongue 17 |
| M22Tong | Oral | Tongue 18 |
| M23Tong | Oral | Tongue 19 |
| M24Tong | Oral | Tongue 20 |
| M31Tong | Oral | Tongue 21 |
| M32Tong | Oral | Tongue 22 |
| M33Tong | Oral | Tongue 23 |
| M34Tong | Oral | Tongue 24 |
| M41Tong | Oral | Tongue 25 |
| M42Tong | Oral | Tongue 26 |
| M43Tong | Oral | Tongue 27 |
| M44Tong | Oral | Tongue 28 |
| M53Tong | Oral | Tongue 29 |
| M54Tong | Oral | Tongue 30 |

|         |      |            |
|---------|------|------------|
| M63Tong | Oral | Tongue 31  |
| F11Mout | Oral | Mouth 1    |
| F12Mout | Oral | Mouth 2    |
| F21Mout | Oral | Mouth 3    |
| F22Mout | Oral | Mouth 4    |
| F31Mout | Oral | Mouth 5    |
| F32Mout | Oral | Mouth 6    |
| M11Mout | Oral | Mouth 7    |
| M12Mout | Oral | Mouth 8    |
| M21Mout | Oral | Mouth 9    |
| M22Mout | Oral | Mouth 10   |
| M31Mout | Oral | Mouth 11   |
| M32Mout | Oral | Mouth 12   |
| M41Mout | Oral | Mouth 13   |
| M42Mout | Oral | Mouth 14   |
| F11Frhd | Skin | Forehead 1 |
| F24Frhd | Skin | Forehead 2 |
| F32Frhd | Skin | Forehead 3 |
| M14Frhd | Skin | Forehead 4 |
| M23Frhd | Skin | Forehead 5 |
| M32Frhd | Skin | Forehead 6 |
| M43Frhd | Skin | Forehead 7 |
| M54Frhd | Skin | Forehead 8 |
| M63Frhd | Skin | Forehead 9 |
| F13Plml | Skin | L Palm 1   |
| F24Plml | Skin | L Palm 2   |
| F31Plml | Skin | L Palm 3   |
| M13Plml | Skin | L Palm 4   |
| M23Plml | Skin | L Palm 5   |
| M33Plml | Skin | L Palm 6   |
| M43Plml | Skin | L Palm 7   |
| M53Plml | Skin | L Palm 8   |
| M63Plml | Skin | L Palm 9   |
| F11Indl | Skin | L index 1  |
| F21Indl | Skin | L index 2  |
| F31Indl | Skin | L index 3  |
| F32Indl | Skin | L index 4  |
| M11Indl | Skin | L index 5  |
| M12Indl | Skin | L index 6  |
| M22Indl | Skin | L index 7  |
| M31Indl | Skin | L index 8  |

|         |      |           |
|---------|------|-----------|
| M41Indl | Skin | L index 9 |
| F11Plmr | Skin | R palm 1  |
| F23Plmr | Skin | R palm 2  |
| F32Plmr | Skin | R palm 3  |
| M11Plmr | Skin | R palm 4  |
| M23Plmr | Skin | R palm 5  |
| M33Plmr | Skin | R palm 6  |
| M43Plmr | Skin | R palm 7  |
| M53Plmr | Skin | R palm 8  |
| M64Plmr | Skin | R palm 9  |
| F12Indr | Skin | R index 1 |
| F21Indr | Skin | R index 2 |
| F31Indr | Skin | R index 3 |
| F32Indr | Skin | R index 4 |
| M11Indr | Skin | R index 5 |
| M21Indr | Skin | R index 6 |
| M31Indr | Skin | R index 7 |
| M41Indr | Skin | R index 8 |
| M42Indr | Skin | R index 9 |



## References

1. Liaw, A. & Wiener, M., *R News* **2** (3), 18-22 (2002).
